# Supplementary material for: Towards efficient quantum computing for quantum chemistry: reducing circuit complexity with transcorrelated and adaptive ansatz techniques
Source: Royal Society of Chemistry journal article supplement (doi:10.1039/d4fd00039k), 2024-01-01
Supplement: d4fd00039k1.pdf [file d4fd00039k1.pdf]

## Supporting Information: Reducing Quantum Circuit Depth for Noise-Resilient Quantum Chemistry using the Transcorrelated Method and Adaptive Ansätze

Erika Magnusson,<sup>1</sup> Aaron Fitzpatrick,<sup>2</sup> Stefan Knecht,<sup>2</sup> Martin Rahm,<sup>1</sup> and Werner Dobrautz<sup>1</sup>

<sup>1</sup>Department of Chemistry and Chemical Engineering,  
Chalmers University of Technology, 41296 Gothenburg, Sweden

<sup>2</sup>Algorithmiq Ltd, Kanavakatu 3C, FI-00160 Helsinki, Finland

(Dated: April 12, 2024)

### CONTENTS

|                                                 |   |
|-------------------------------------------------|---|
| I. Robustness of the algorithm                  | 1 |
| II. Table of converged results                  | 1 |
| III. (TC-)AVQITE trajectories                   | 1 |
| IV. Better convergence by cutting circuit depth | 1 |
| References                                      | 2 |

### I. ROBUSTNESS OF THE ALGORITHM

We investigate the algorithm’s robustness by adjusting how operators are appended in TC-AVQITE for the  $H_4$  system with a bond length 1.23 Å. We tested two parameters:  $i_{\max}$ , the maximum amount of added operators per iteration, and  $d$ , the minimum amount of iterations before adding additional operators.

Figure 1 shows that modifying the parameters  $i_{\max}$  and  $d$  influences the total parameter count, however, it does so equally between TC-AVQITE and AVQITE. This result suggests that these parameters can simply be treated as any other parameter – an appropriate setting for a desired quality of simulation will not favour either method unfairly. One unexpected result arises at the point  $(d, i_{\max}) = (5, 0)$ , where, for some unclear reason, the AVQITE simulation converges with fewer parameters than TC-AVQITE. This behaviour is, however, only observed once.

In general, increasing the number of iterations,  $d$ , before adding new operators naturally slows down the simulation in imaginary time, i.e., more steps are required to reach convergence. However, as there appears to be no clear benefit of doing so, the parameters  $d$  and  $i_{\max}$  can safely be ignored. In all simulations other than this test, we use the values (0,7) of the parameters  $(d, i_{\max})$ .

Furthermore, parameters such as the imaginary time step  $\Delta\tau$ , and the McLachlan distance cutoff  $L_{\text{cut}}$  were adjusted to see if it unfairly affected simulation quality of TC-AVQITE and AVQITE. As no trend difference was observed, we conclude that TC-AVQITE is robust w.r.t these parameters. For all simulations other than the test, we use the values  $\Delta\tau = 0.05$  and  $L_{\text{cut}} = 1 \times 10^{-5}$ .

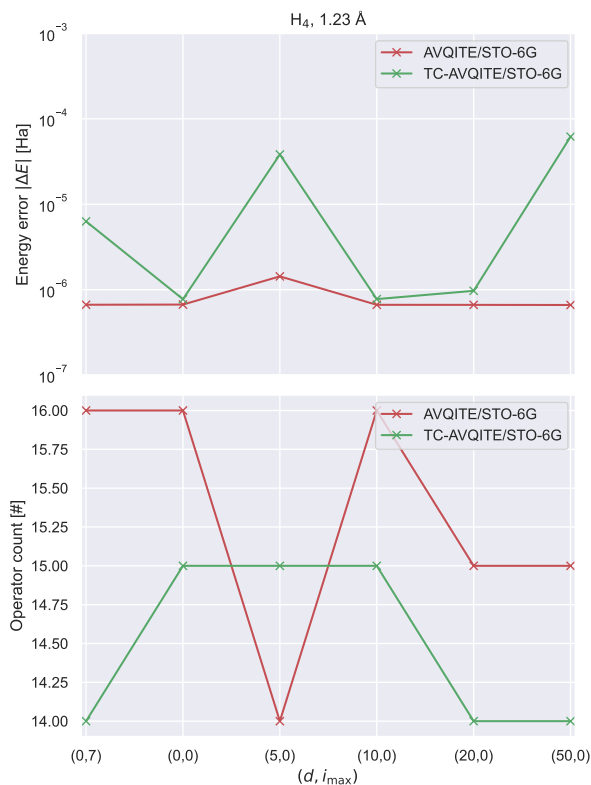

FIG. 1: The effect of the parameters  $i_{\max}$  and  $d$  for  $H_4$  at bond length 1.23 Å. Each point represents a different run with parameter settings  $(d, i_{\max})$ .

### II. TABLE OF CONVERGED RESULTS

Table I summarises the final values of all (TC-) AVQITE trajectories.

### III. (TC-)AVQITE TRAJECTORIES

Figures 2-15 show all individual (TC-)AVQITE trajectories.

### IV. BETTER CONVERGENCE BY CUTTING CIRCUIT DEPTH

In the main results, TC-AVQITE outperforms AVQITE in the number of appended operators and final energy. Previous findings for ADAPT-VQE suggest that the en-

TABLE I: A summary of the final values of all (TC-)AVQITE trajectories. Every entry in this table corresponds to a point in Fig. 6 in the main results. Energies are given in Hartrees.

| System <sup>a</sup>          | Bonding regime | Final energy | $ \Delta E $ to STO-6G/<br>FCI or ED <sup>b</sup> | $ \Delta E $ to CBS/FCI | # operators |
|------------------------------|----------------|--------------|---------------------------------------------------|-------------------------|-------------|
| H <sub>4</sub> , 1.0 Å       | Repulsive      | -1.781 25    | $1.514 \times 10^{-1}$                            | $3.256 \times 10^{-1}$  | 17          |
| H <sub>4</sub> , 1.0 Å, TC   | Repulsive      | -1.997 98    | $7.529 \times 10^{-7}$                            | $1.089 \times 10^{-1}$  | 15          |
| H <sub>4</sub> , 1.23 Å      | Bonding        | -1.985 60    | $6.657 \times 10^{-7}$                            | $1.343 \times 10^{-1}$  | 16          |
| H <sub>4</sub> , 1.23 Å, TC  | Bonding        | -2.056 75    | $6.298 \times 10^{-6}$                            | $6.311 \times 10^{-2}$  | 14          |
| H <sub>4</sub> , 2.0 Å       | Half-broken    | -1.915 44    | $9.078 \times 10^{-5}$                            | $1.324 \times 10^{-1}$  | 15          |
| H <sub>4</sub> , 2.0 Å, TC   | Half-broken    | -2.014 37    | $2.167 \times 10^{-6}$                            | $3.349 \times 10^{-2}$  | 15          |
| H <sub>4</sub> , 3.0 Å       | Broken         | -1.883 81    | $1.501 \times 10^{-3}$                            | $1.198 \times 10^{-1}$  | 18          |
| H <sub>4</sub> , 3.0 Å, TC   | Broken         | -1.990 37    | $6.199 \times 10^{-4}$                            | $1.329 \times 10^{-2}$  | 14          |
| LiH, 1.6 Å                   | Bonding        | -7.972 25    | $4.533 \times 10^{-6}$                            | $9.812 \times 10^{-2}$  | 115         |
| LiH, 1.6 Å, TC               | Bonding        | -8.054 44    | $1.309 \times 10^{-5}$                            | $1.593 \times 10^{-2}$  | 54          |
| LiH, 2.25 Å                  | Half-broken    | -7.930 92    | $4.056 \times 10^{-6}$                            | $1.141 \times 10^{-1}$  | 105         |
| LiH, 2.25 Å, TC              | Half-broken    | -8.024 26    | $9.487 \times 10^{-6}$                            | $2.077 \times 10^{-2}$  | 66          |
| LiH, 3.0 Å                   | Broken         | -7.887 51    | $3.781 \times 10^{-6}$                            | $1.203 \times 10^{-1}$  | 109         |
| LiH, 3.0 Å, TC               | Broken         | -7.988 03    | $1.661 \times 10^{-5}$                            | $1.974 \times 10^{-2}$  | 68          |
| H <sub>2</sub> O, 0.96 Å     | Bonding        | -75.714 67   | $2.490 \times 10^{-6}$                            | $6.583 \times 10^{-1}$  | 143         |
| H <sub>2</sub> O, 0.96 Å, TC | Bonding        | -76.036 28   | $3.076 \times 10^{-6}$                            | $3.366 \times 10^{-1}$  | 106         |
| H <sub>2</sub> O, 1.5 Å      | Half-broken    | -75.590 79   | $2.082 \times 10^{-6}$                            | $5.898 \times 10^{-1}$  | 190         |
| H <sub>2</sub> O, 1.5 Å, TC  | Half-broken    | -75.920 23   | $3.041 \times 10^{-6}$                            | $2.603 \times 10^{-1}$  | 174         |
| H <sub>2</sub> O, 2.5 Å      | Broken         | -75.461 76   | $9.917 \times 10^{-2}$                            | $5.283 \times 10^{-1}$  | 119         |
| H <sub>2</sub> O, 2.5 Å, TC  | Broken         | -75.923 01   | $5.563 \times 10^{-4}$                            | $6.705 \times 10^{-2}$  | 142         |

<sup>a</sup> Syntax: Molecule, bond length. TC-AVQITE trajectories are marked TC, and AVQITE trajectories are unmarked.

<sup>b</sup> If Absolute energy error to basis set is lower than  $1 \times 10^{-3}$  Ha, we have achieved “computational accuracy”.

TABLE II: Comparison of TC-AVQITE and TC-VarQITE, i.e. with and without the adaptive ansätze. Energies in Hartrees. Bold font indicates the result with a lower error.

| System <sup>a</sup>                 | Operator count | $ \Delta E $ to basis set <sup>b</sup> |
|-------------------------------------|----------------|----------------------------------------|
| H <sub>4</sub> , 1.0 Å, TC-VarQITE  | 149            | $9.174 \times 10^{-5}$                 |
| H <sub>4</sub> , 1.0 Å, TC-AVQITE   | 15             | $7.529 \times 10^{-7}$                 |
| H <sub>4</sub> , 1.23 Å, TC-VarQITE | 149            | $2.158 \times 10^{-4}$                 |
| H <sub>4</sub> , 1.23 Å, TC-AVQITE  | 14             | $6.298 \times 10^{-6}$                 |
| H <sub>4</sub> , 2.0 Å, TC-VarQITE  | 149            | $1.026 \times 10^{-3}$                 |
| H <sub>4</sub> , 2.0 Å, TC-AVQITE   | 15             | $2.167 \times 10^{-6}$                 |
| H <sub>4</sub> , 3.0 Å, TC-VarQITE  | 149            | $3.502 \times 10^{-4}$                 |
| H <sub>4</sub> , 3.0 Å, TC-AVQITE   | 14             | $6.199 \times 10^{-4}$                 |

<sup>a</sup>Syntax: Molecule, bond length, method. <sup>b</sup> If Absolute energy error to basis set is lower than  $1 \times 10^{-3}$  Ha, we have achieved “computational accuracy”.

ergy difference could also partly be caused by using adaptive ansätze.<sup>1</sup> To evaluate if this holds for TC-AVQITE, we compare it with the TC method using a full UCCSD ansatz (TC-VarQITE), i.e., without an adaptive approach for H<sub>4</sub> at all four studied bond distances (Figs. 12-15). We summarize the result from this comparison in Table II.

The results show that TC-AVQITE is usually more accurate w.r.t. the basis set ED – TC energy than the TC UCCSD calculation (except for the broken-bond regime, where both perform roughly equivalent). This finding suggests that similar to ADAPT-VQE findings,<sup>1</sup> adaptive ansätze improves convergence within a TC setting.

<sup>1</sup> H. R. Grimsley, S. E. Economou, E. Barnes, and N. J. Mayhall, Nature Communications **10** (2019), 10.1038/s41467-

019-10988-2, publisher: Springer Science and Business Media LLC.

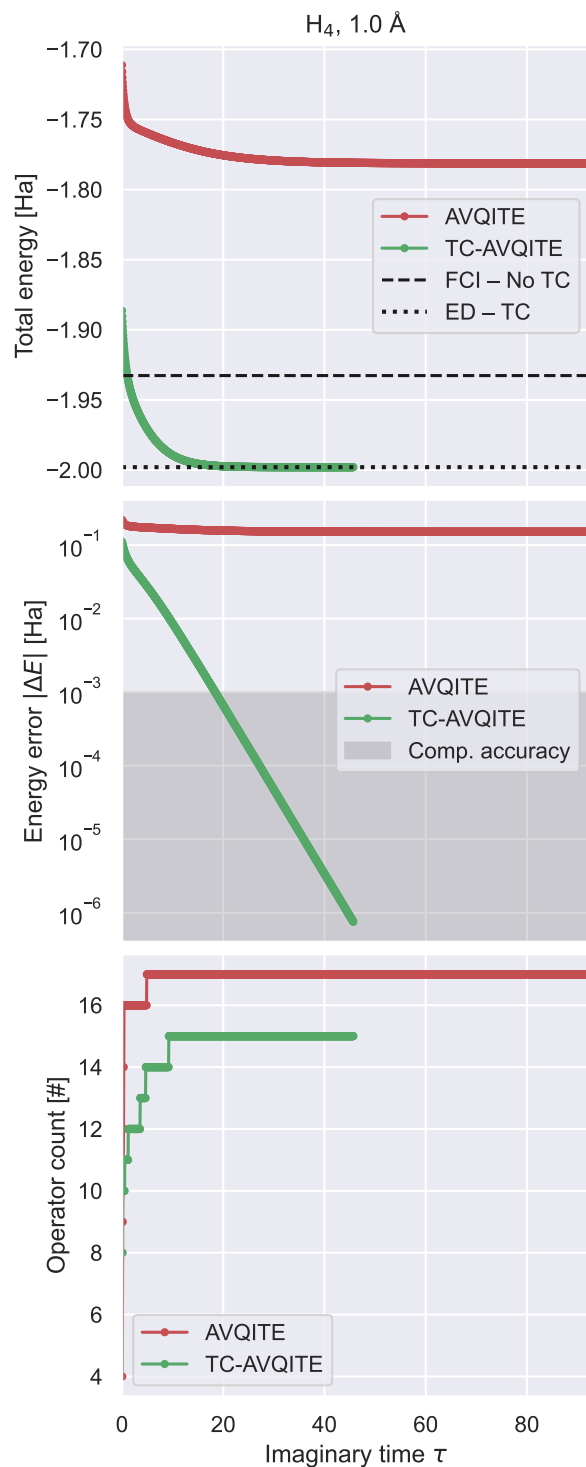

FIG. 2: A comparison between TC-AVQITE and AVQITE for  $H_4$  with bond length 1.0 Å, corresponding to rows 1 and 2 in Table I.

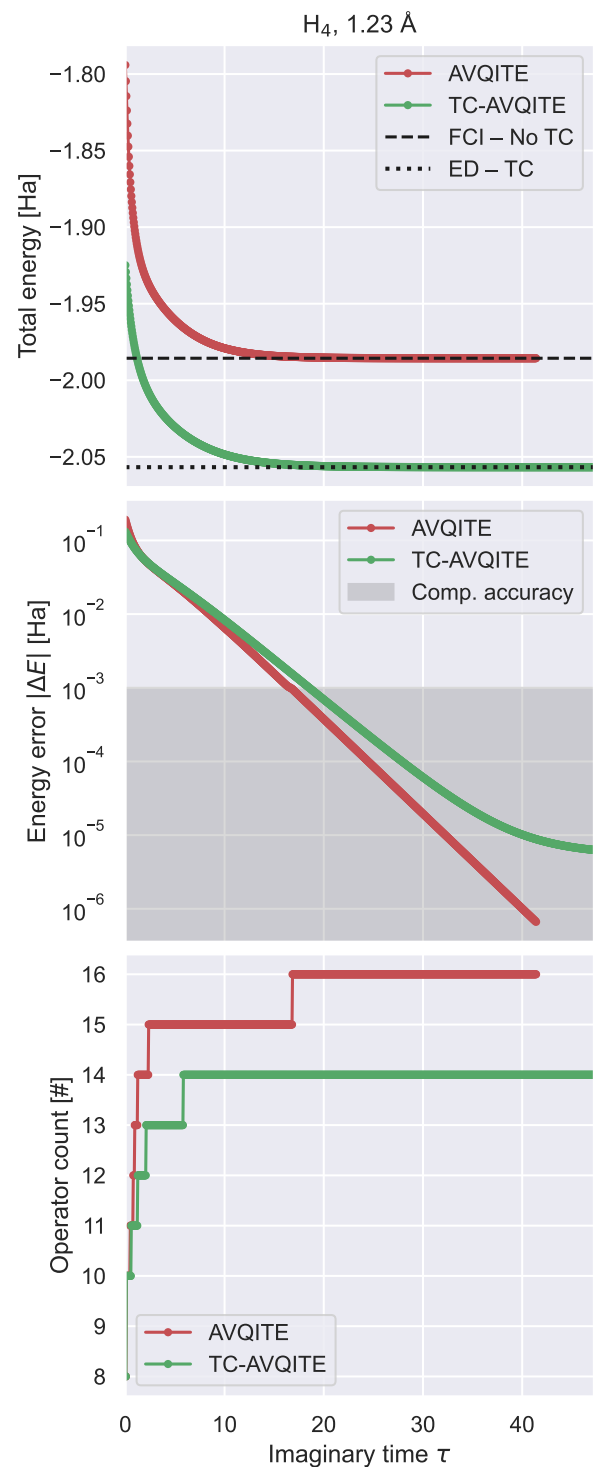

FIG. 3: A comparison between TC-AVQITE and AVQITE for  $H_4$  with bond length 1.23 Å, corresponding to rows 3 and 4 in Table I.

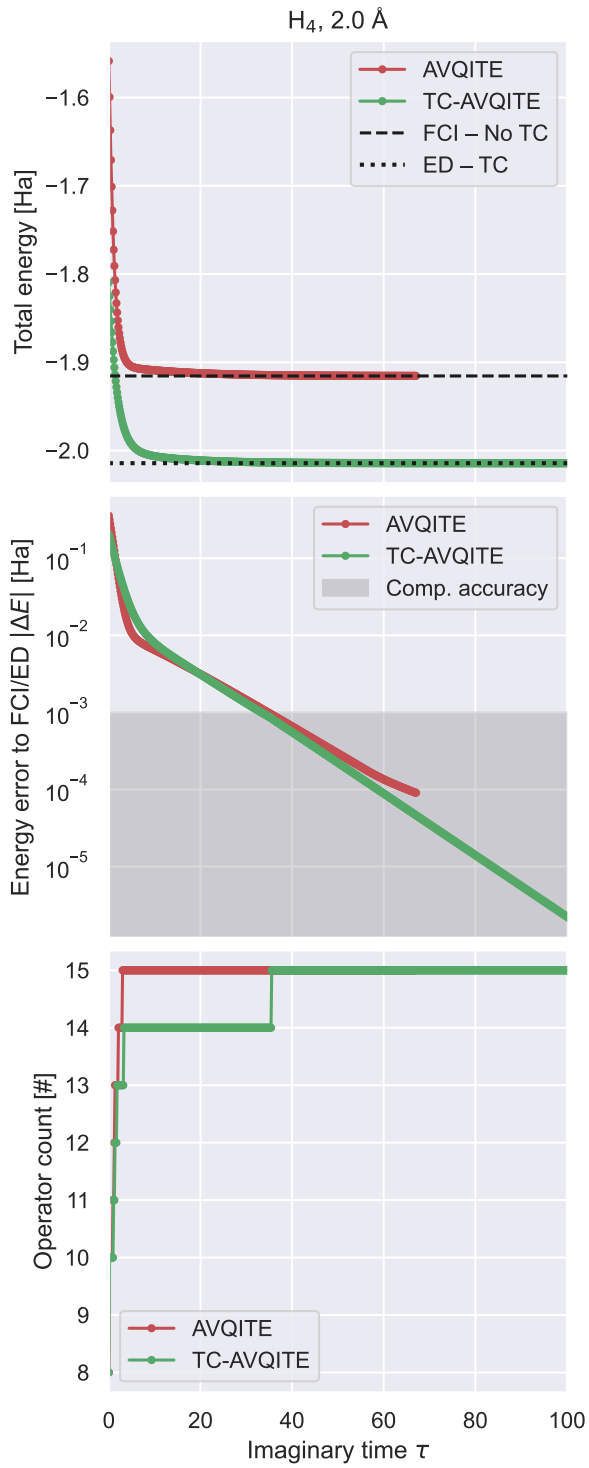

FIG. 4: A comparison between TC-AVQITE and AVQITE for  $H_4$  with bond length 2.0 Å, corresponding to rows 5 and 6 in Table I.

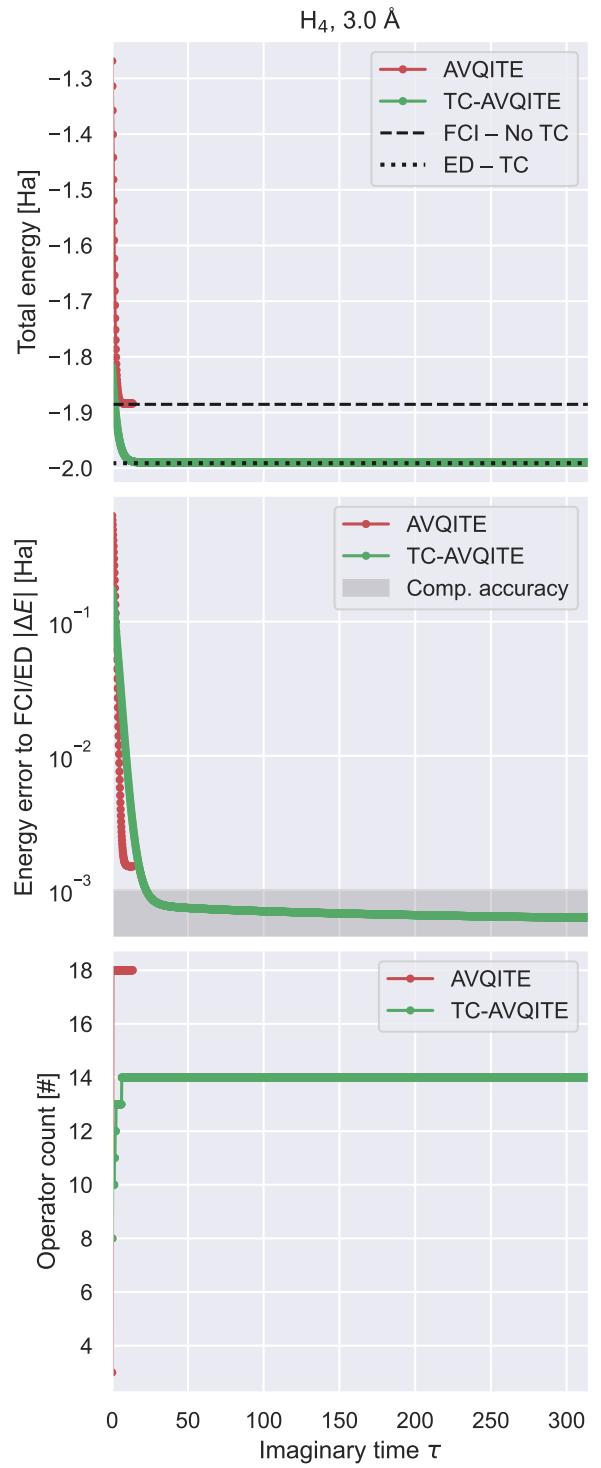

FIG. 5: A comparison between TC-AVQITE and AVQITE for  $H_4$  with bond length 3.0 Å, corresponding to rows 7 and 8 in Table I.

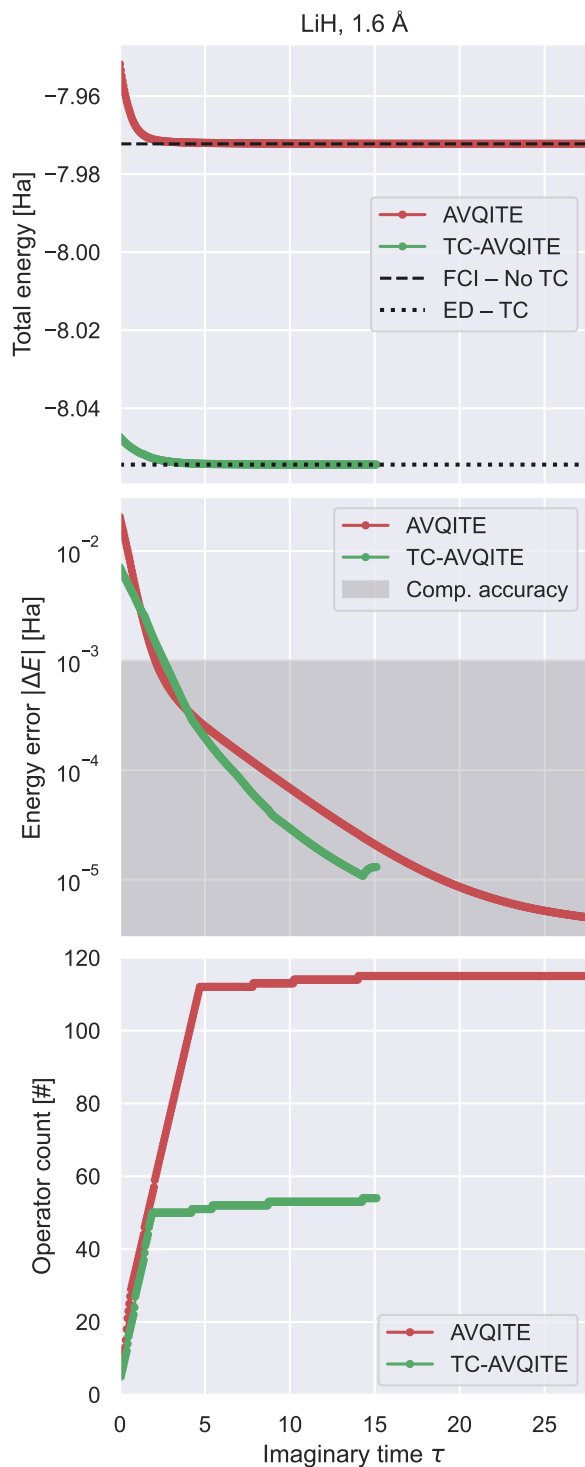

FIG. 6: A comparison between TC-AVQITE and AVQITE for LiH with bond length 1.6 Å, corresponding to rows 9 and 10 in Table I.

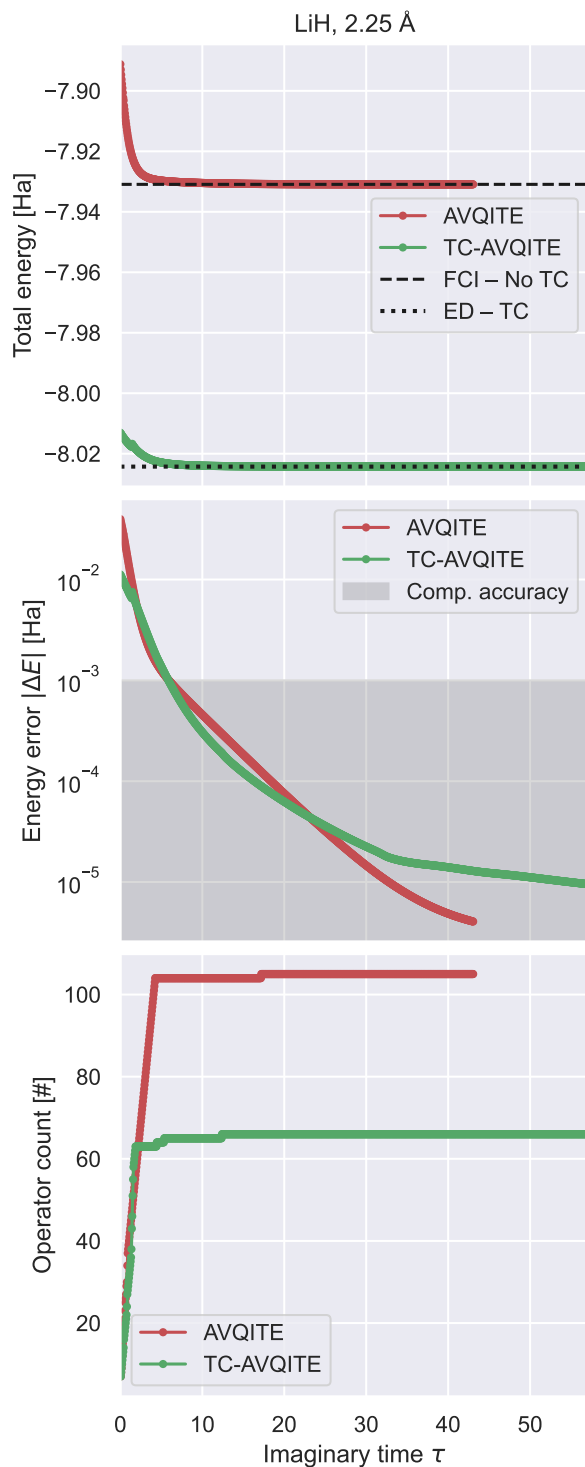

FIG. 7: A comparison between TC-AVQITE and AVQITE for LiH with bond length 2.25 Å, corresponding to rows 11 and 12 in Table I.

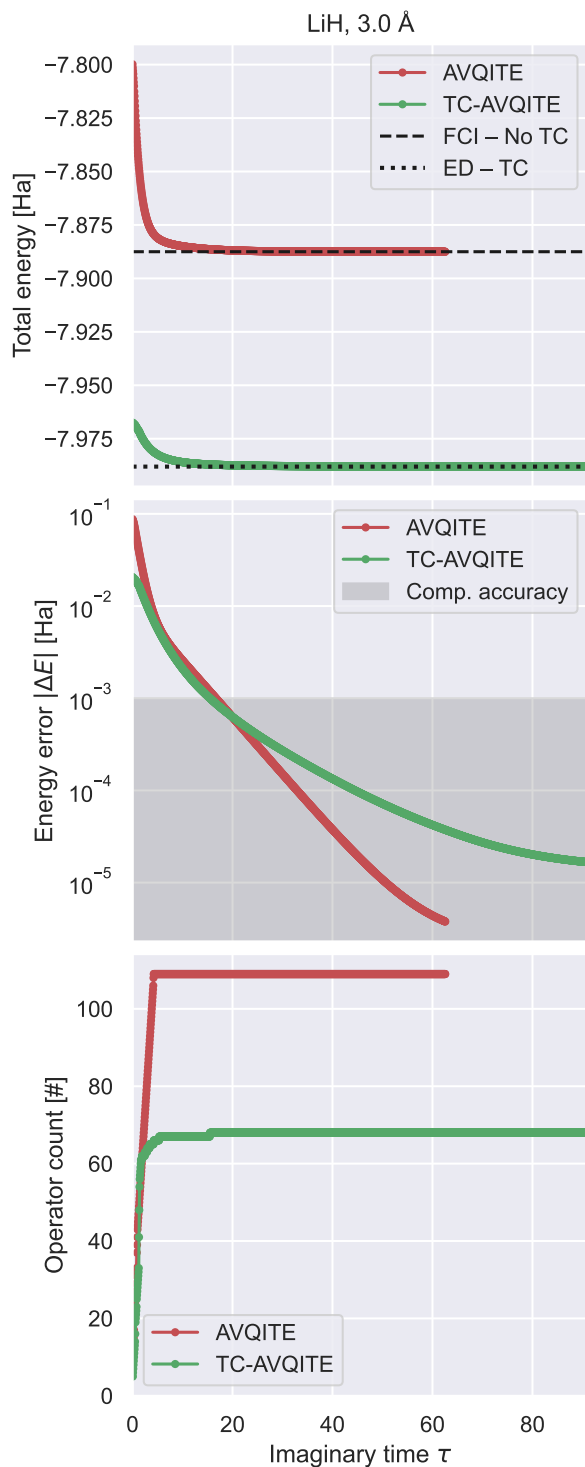

FIG. 8: A comparison between TC-AVQITE and AVQITE for LiH with bond length  $3.0 \text{ \AA}$ , corresponding to rows 13 and 14 in Table I.

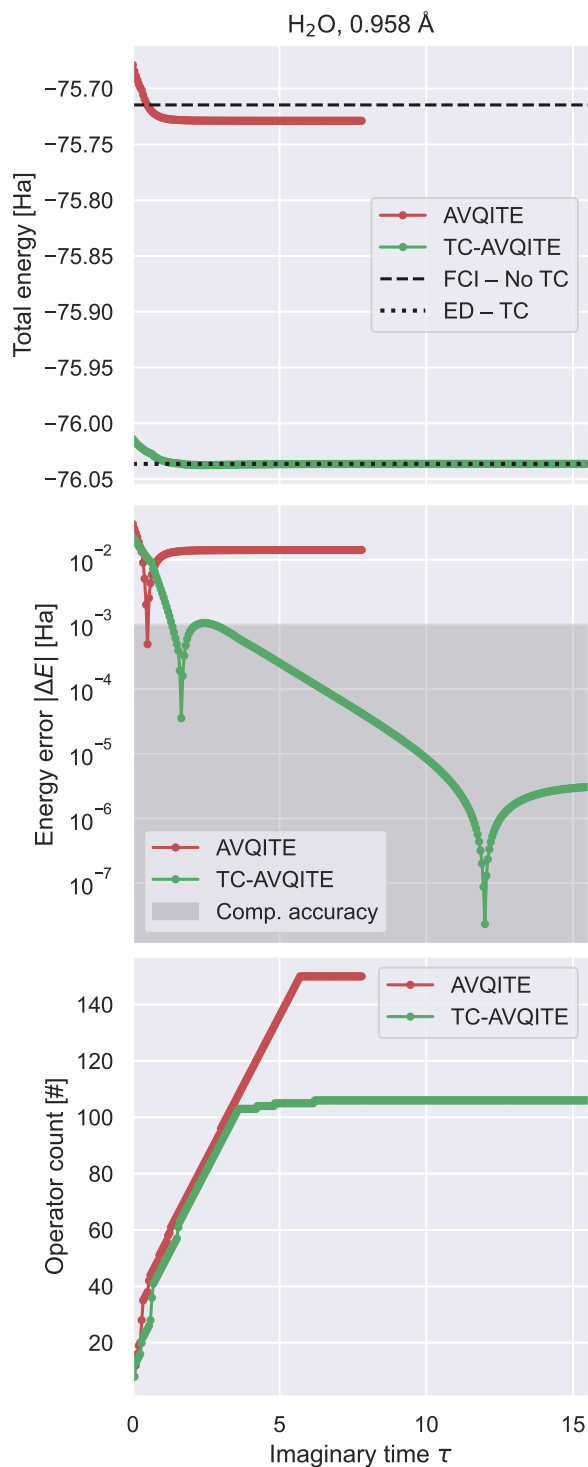

FIG. 9: A comparison between TC-AVQITE and AVQITE for  $\text{H}_2\text{O}$  with bond length  $0.958 \text{ \AA}$ , corresponding to rows 15 and 16 in Table I.

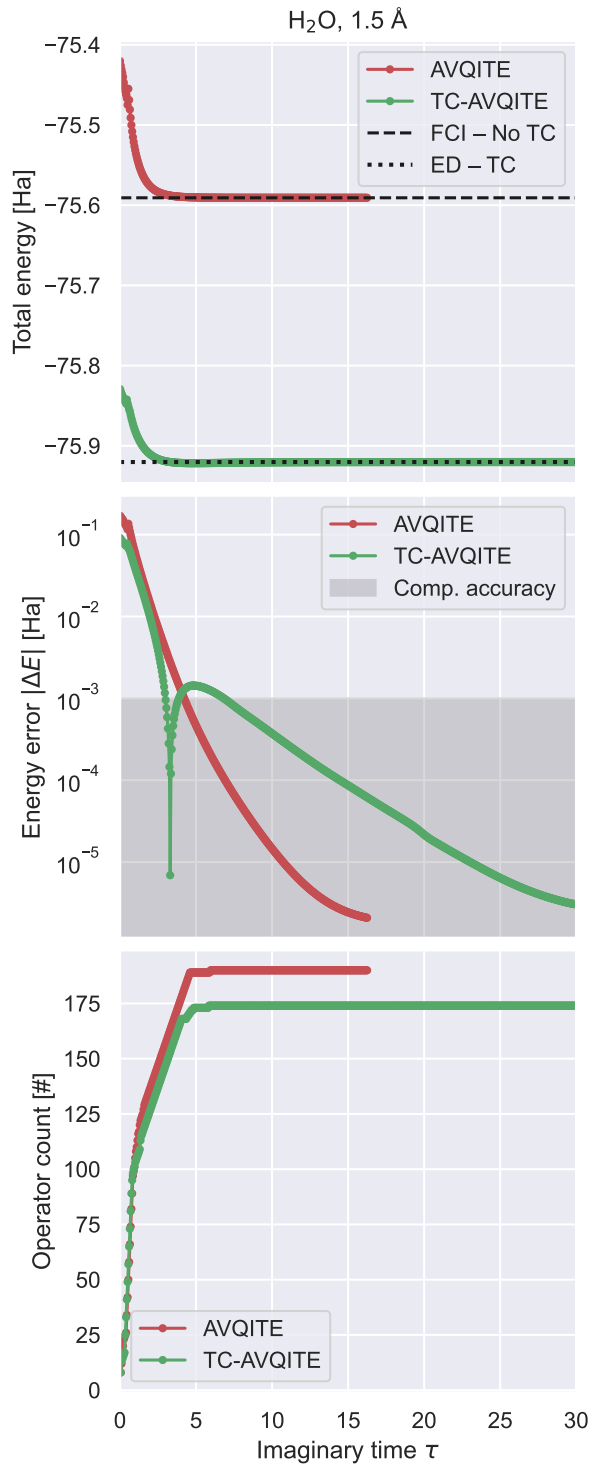

FIG. 10: A comparison between TC-AVQITE and AVQITE for H<sub>2</sub>O with bond length 1.5 Å, corresponding to rows 17 and 18 in Table I.

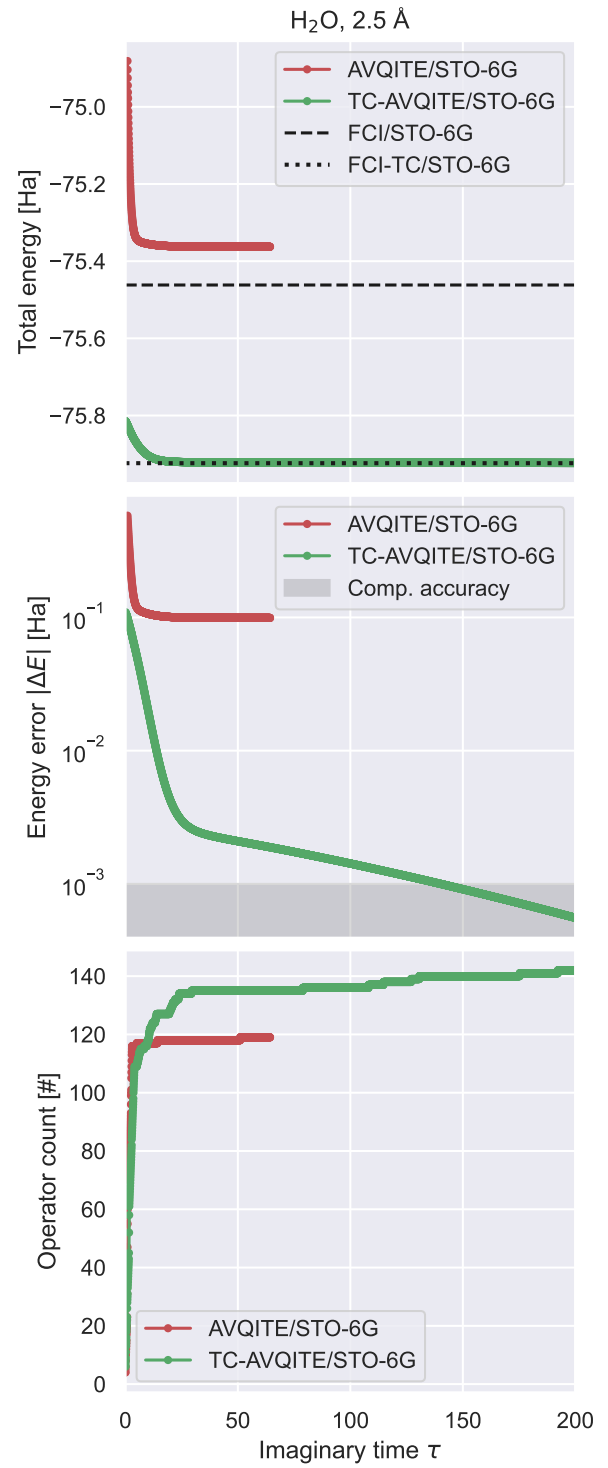

FIG. 11: A comparison between TC-AVQITE and AVQITE for H<sub>2</sub>O with bond length 2.5 Å, corresponding to rows 19 and 20 in Table I.

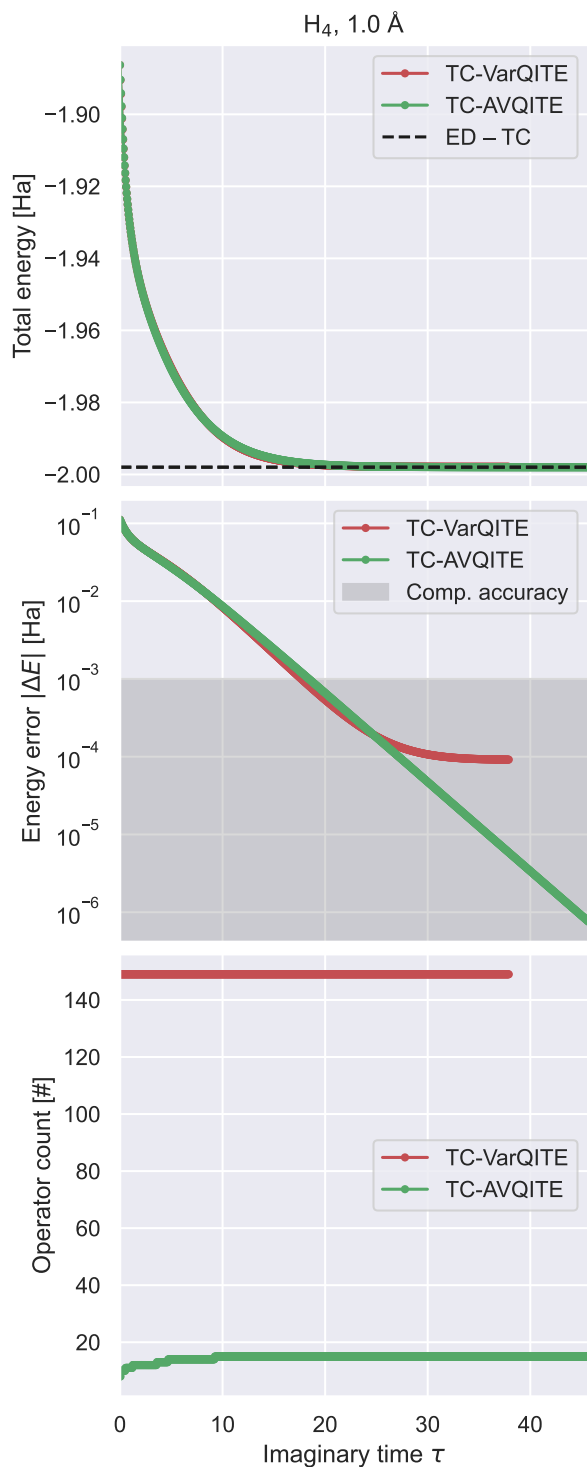

FIG. 12: A comparison between TC-AVQITE and TC-VarQITE for  $H_4$  with bond length  $1.0 \text{ \AA}$ , corresponding to rows 1 and 2 in Table II.

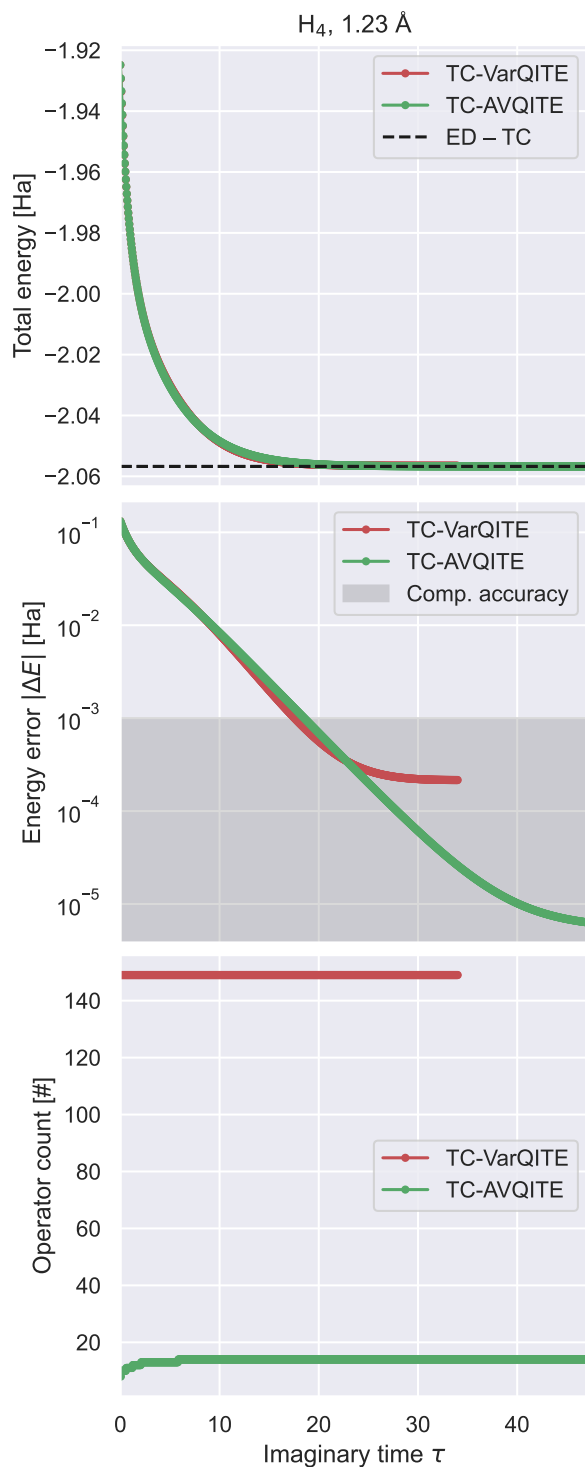

FIG. 13: A comparison between TC-AVQITE and TC-VarQITE for  $H_4$  with bond length  $1.23 \text{ \AA}$ , corresponding to rows 3 and 4 in Table II.



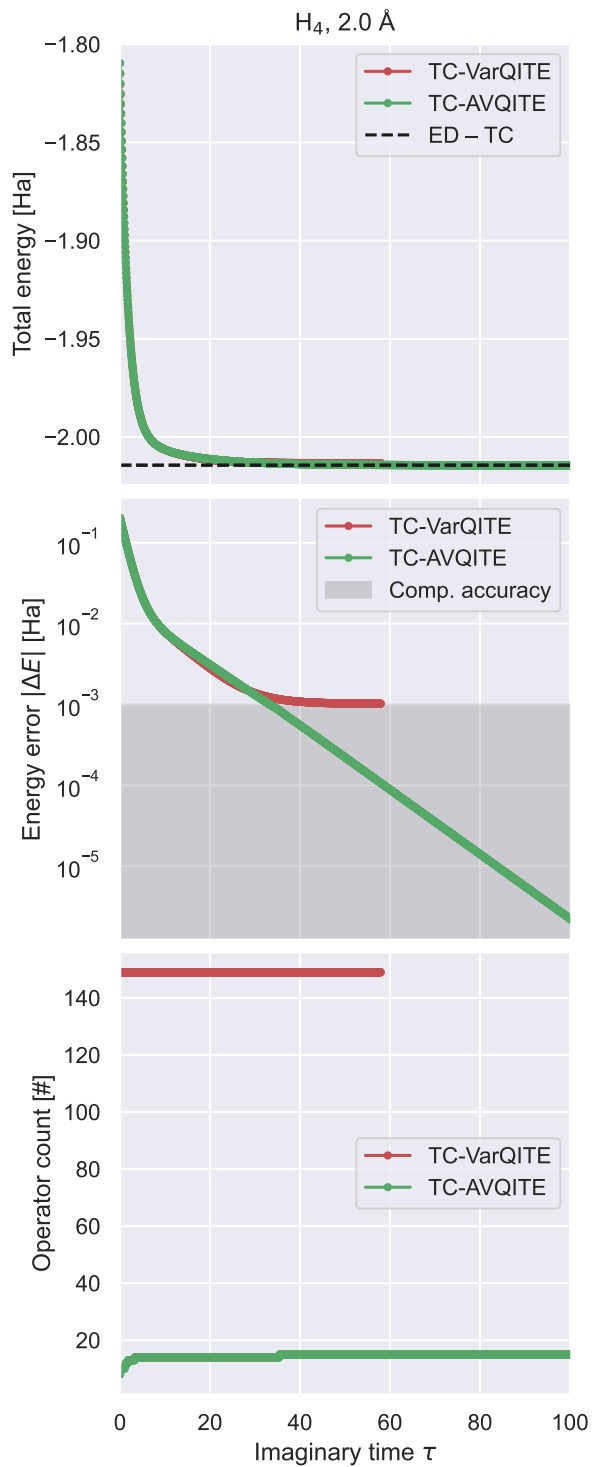

FIG. 14: A comparison between TC-AVQITE and TC-VarQITE for  $H_4$  with bond length  $2.0 \text{ \AA}$ , corresponding to rows 5 and 6 in Table II.

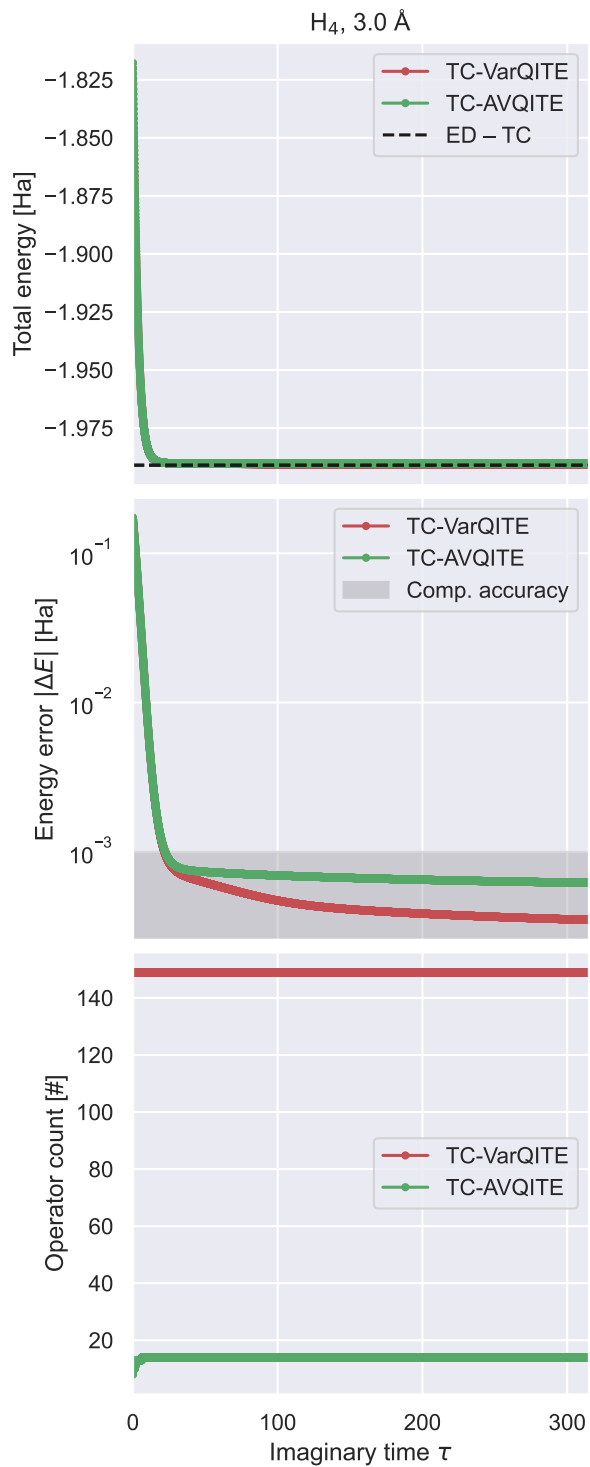

FIG. 15: A comparison between TC-AVQITE and TC-VarQITE for  $H_4$  with bond length  $3.0 \text{ \AA}$ , corresponding to rows 7 and 8 in Table II.
